# Supplementary material for: Molecular architecture of the augmin complex
Source: PubMed Central journal article supplement (PMC9481612; doi:10.1038/s41467-022-33227-7), 2022-09-16

# Source Data

Figure 1b

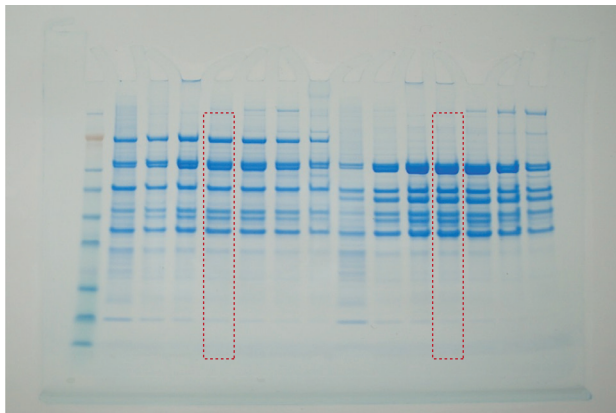

Supplementary Figure 6a

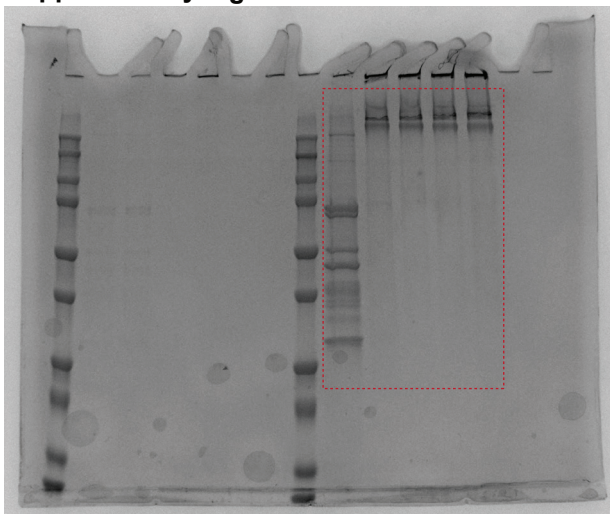

Supplement: 41467_2022_33227_MOESM7_ESM.pdf [file 41467_2022_33227_MOESM7_ESM.pdf]
